# Supplementary material for: Differences in Susceptibility to Heat Stress along the Chicken Intestine and the Protective Effects of Galacto-Oligosaccharides
Source: PubMed Central journal article supplement (PMC4581695; doi:10.1371/journal.pone.0138975), 2015-09-24
Supplement: pone.0138975.s004.pdf [file pone.0138975.s004.pdf]

**S1 Table.**

| <b>Ingredients</b>    | <b>Value (g/kg)</b> | <b>Nutrients</b>        | <b>Value (g/kg)</b> | <b>Amino Acids</b> | <b>Total (g/kg)</b> |
|-----------------------|---------------------|-------------------------|---------------------|--------------------|---------------------|
| Maize                 | 322,20              | Dry matter              | 879,60              | Isoleucine         | 8,30                |
| Wheat + xylanase      | 250,00              | Crude ash               | 50,10               | Leucine            | 15,93               |
| Soya                  | 225,00              | Crude protein           | 204,20              | Lysine             | 11,75               |
| Rapeseed meal         | 30,00               | Crude fat               | 70,80               | Methionine         | 5,19                |
| Peas (dry)            | 50,00               | Crude fiber             | 30,50               | Cystine            | 3,44                |
| Soy bean (heated)     | 50,00               | Carbohydrates           | 525,30              | Phenylalanine      | 9,67                |
| Lard                  | 20,00               | Organic matter          | 146,00              | Tyrosine           | 6,95                |
| Soy bean oil          | 20,00               | Starch                  | 389,20              | Threonine          | 7,96                |
| Premix (maize)        | 5,00                | Sugars                  | 40,40               | Tryptophan         | 2,33                |
| Chalk                 | 13,00               | Neutral detergent fibre | 99,30               | Valine             | 9,34                |
| Limestone             | 0,00                | Acid detergent fibre    | 39,70               | Arginine           | 13,14               |
| Monocalcium phosphate | 6,00                | Calcium                 | 7,90                | Histidine          | 5,29                |
| Salt (NaCl)           | 2,20                | Total phosphorus        | 4,90                | Alanine            | 9,33                |
| NaHCO <sub>3</sub>    | 2,00                | Magnesium               | 1,60                | Aspartic acid      | 19,42               |
| Phytase               | 0,10                | Potassium               | 9,00                | Glutamic acid      | 38,27               |
| L-lysine HCL          | 1,70                | Sodium                  | 1,48                | Glycine            | 8,39                |
| DL-methionine         | 2,20                | Chlorine                | 2,00                | Proline            | 12,33               |
| L-threonine           | 0,60                | Base-excess (mEq/kg)    | 235,50              | Serine             | 9,85                |
|                       |                     | Net energy (MJ/kg)      | 10,40               |                    |                     |
|                       |                     | Linoleic acid (MJ/kg)   | 26,80               |                    |                     |
|                       |                     | Fe (mg/kg)              | 136,00              |                    |                     |
|                       |                     | Mn (mg/kg)              | 21,00               |                    |                     |
|                       |                     | Zn (mg/kg)              | 30,00               |                    |                     |
|                       |                     | Cu (mg/kg)              | 6,00                |                    |                     |
