# Supplementary material for: Differences in Susceptibility to Heat Stress along the Chicken Intestine and the Protective Effects of Galacto-Oligosaccharides
Source: PubMed Central journal article supplement (PMC4581695; doi:10.1371/journal.pone.0138975), 2015-09-24
Supplement: pone.0138975.s005.pdf [file pone.0138975.s005.pdf]

**S2 Table.**

| <b>Primer sequence (5'-3')</b>  |                                |                                |           |                   |
|---------------------------------|--------------------------------|--------------------------------|-----------|-------------------|
| <b>Gene</b>                     | <b>Forward</b>                 | <b>Reverse</b>                 | <b>AT</b> | <b>References</b> |
| <b>ACTB</b>                     | ATGTGGATCAGCAAGCAGGAGTA        | TTTATGCGCATTTATGGGTTTTGT       | 61        | NM_205518.1       |
| <b>Claudin-1</b>                | CTGATTGCTTCCAACCAG             | CAGGTCAAACAGAGGTACAGG          | 58        | NM_001013611      |
| <b>Claudin-5</b>                | CATCACTTCTCCTTCGTCAGC          | GCACAAAGATCTCCCAGGTC           | 58        | NM_204201         |
| <b>E-cadherin</b>               | GACAGGGACATGAGGCAGAA           | GCCGTGACAATGCCATTCTC           | 64.3      | NM_001039258.2    |
| <b>HIF-1<math>\alpha</math></b> | ACCATTACCATACTTCAGCAG          | CTTCACATCATCCAGACGTTTC         | 65        | NM_204297         |
| <b>HO-1</b>                     | CTTCGCACAAGGAGTGTTAAC          | CATCCTGCTTGTCTCTCAC            | 63        | NM_205344         |
| <b>HSF1</b>                     | CAGGGAAGCAGTTGGTTCCTACACG      | CCTTGGGTTTGGGTTGCTCAGTC        | 65        | L06098.1          |
| <b>HSF3</b>                     | TCCACCTCTCCTCTCGGAAG           | CAACAGGACTGAGGAGCAGG           | 57        | L06126.1          |
| <b>HSP70</b>                    | TCTCATCAAGCGTAACACCAC          | TCTCACCTTCATACACCTGGAC         | 55        | JX827254.1        |
| <b>HSP90</b>                    | ATGCCGGAAGCTGTGCAAACACAGGACCAA | GGAATCAGGTTAATTTTCAGGTCTTTTCCA | 63.1      | NM_001109785.1    |
| <b>IL-6</b>                     | GCTCGCCGGCTTCGA                | GGTAGGTCTGAAAGGCGAACAG         | 58.7      | HM179640.1        |
| <b>IL-8</b>                     | CACGTTCAAGCATTGAACTC           | GACTTCCACATTCTTGCACTG          | 61.2      | NM_205018.1       |
| <b>occludin</b>                 | ACGGCAGCACCTACCTCAA            | GGGCGAAGAAGCAGATGAG            | 61.2      | D21837.1          |
| <b>TLR-2</b>                    | CCTGCAACGGTCACTTCAG            | GTCTCAGGGCTTGTCTTCAG           | 59        | NM_204278         |
| <b>TLR-4</b>                    | CTGACCTACCCATCGGACAC           | GCCTGAGAGAGGTCAGGTTG           | 59        | NM_001030693      |
| <b>ZO-1</b>                     | CTTCAGGTGTTTCTCTCCTCCTC        | CTGTGGTTTCATGGCTGGATC          | 59        | XM_413773         |
